# Supplementary material for: A Serious Game Approach to Improve Food Behavior in Families—A Pilot Study
Source: MDPI journal article supplement (doi:10.3390/nu12051415), 2020-05-14
Supplement: s1 [file s1]

## Supplementary files

**Table 1:** Mean (SEM) number of words used to describe the six F&V in the baseline and follow-up test, and significance in difference for the treatment and age groups.

|             |           | GC            |                | Children      |                |                      | GP            |                | Parents       |                |                      |
|-------------|-----------|---------------|----------------|---------------|----------------|----------------------|---------------|----------------|---------------|----------------|----------------------|
|             |           | Mean<br>(SEM) | p <sup>a</sup> | Mean<br>(SEM) | p <sup>a</sup> | Diff. p <sup>b</sup> | Mean<br>(SEM) | p <sup>a</sup> | Mean<br>(SEM) | p <sup>a</sup> | Diff. p <sup>b</sup> |
| Carrot      |           |               |                |               |                |                      |               |                |               |                |                      |
| Total       | Baseline  | 3.7 (0.6)     |                | 3.9 (0.4)     |                |                      | 4.9 (0.6)     | *              | 4.9 (0.4)     |                | *                    |
|             | Follow-up | 2.9 (0.3)     |                | 4.1 (0.3)     |                |                      | 3.8 (0.5)     |                | 5.5 (0.8)     |                |                      |
| Hedonic     | Baseline  | 0.2 (0.1)     |                | 0.3 (0.2)     |                |                      | 0.3 (0.1)     |                | 0.3 (0.2)     |                |                      |
|             | Follow-up | 0.2 (0.1)     |                | 0.0 (0.0)     |                |                      | 0.0 (0.0)     |                | 0.0 (0.0)     |                |                      |
| Descriptive | Baseline  | 2.7 (0.5)     |                | 3.3 (0.4)     |                | *                    | 3.2 (0.3)     |                | 3.4 (0.8)     |                |                      |
|             | Follow-up | 2.4 (0.4)     |                | 4.0 (0.3)     |                |                      | 2.6 (0.3)     |                | 4.4 (0.8)     |                |                      |
| Other       | Baseline  | 0.8 (0.4)     | *              | 0.4 (0.4)     |                |                      | 1.5 (0.5)     |                | 1.3 (0.8)     |                |                      |
|             | Follow-up | 0.3 (0.2)     |                | 0.1 (0.1)     |                |                      | 1.3 (0.3)     |                | 1.1 (1.0)     |                |                      |
| Banana      |           |               |                |               |                |                      |               |                |               |                |                      |
| Total       | Baseline  | 4.2 (0.9)     |                | 4.0 (0.4)     |                |                      | 5.1 (0.8)     |                | 5.1 (0.7)     |                |                      |
|             | Follow-up | 3.5 (0.5)     |                | 4.3 (0.4)     |                |                      | 3.8 (0.4)     |                | 4.6 (0.6)     |                |                      |
| Hedonic     | Baseline  | 0.3 (0.2)     |                | 0.5 (0.2)     |                |                      | 0.4 (0.1)     |                | 0.4 (0.2)     |                |                      |
|             | Follow-up | 0.1 (0.1)     |                | 0.0 (0.0)     |                |                      | 0.3 (0.1)     |                | 0.0 (0.0)     |                |                      |
| Descriptive | Baseline  | 2.8 (0.6)     |                | 2.8 (0.4)     | *              |                      | 3.0 (0.6)     |                | 4.0 (0.9)     |                |                      |
|             | Follow-up | 2.9 (0.5)     |                | 4.0 (0.5)     |                |                      | 2.8 (0.3)     |                | 3.9 (0.6)     |                |                      |
| Other       | Baseline  | 1.1 (0.6)     |                | 0.8 (0.4)     |                |                      | 1.7 (0.4)     |                | 0.8 (0.5)     |                |                      |
|             | Follow-up | 0.5 (0.2)     |                | 0.3 (0.2)     |                |                      | 0.7 (0.1)     |                | 0.8 (0.3)     |                |                      |
| Broccoli    |           |               |                |               |                |                      |               |                |               |                |                      |
| Total       | Baseline  | 3.1 (0.8)     |                | 3.4 (0.3)     |                |                      | 4.7 (0.5)     |                | 4.6 (0.6)     |                |                      |
|             | Follow-up | 3.2 (0.5)     |                | 3.5 (0.4)     |                |                      | 3.9 (0.5)     |                | 4.3 (0.6)     |                |                      |
| Hedonic     | Baseline  | 0.4 (0.2)     |                | 0.4 (0.2)     |                |                      | 0.3 (0.1)     |                | 0.9 (0.3)     |                |                      |
|             | Follow-up | 0.2 (0.1)     |                | 0.0 (0.0)     |                |                      | 0.0 (0.0)     |                | 0.1 (0.1)     |                |                      |
| Descriptive | Baseline  | 1.5 (0.3)     |                | 2.4 (0.3)     |                |                      | 2.8 (0.6)     |                | 2.1 (0.4)     |                |                      |
|             | Follow-up | 1.4 (0.3)     |                | 3.0 (0.5)     |                |                      | 2.3 (0.3)     |                | 2.8 (0.5)     |                |                      |
| Other       | Baseline  | 1.2 (0.6)     |                | 0.6 (0.2)     |                |                      | 1.5 (0.4)     |                | 1.6 (0.5)     |                |                      |
|             | Follow-up | 1.6 (0.4)     |                | 0.5 (0.2)     |                |                      | 1.6 (0.3)     |                | 1.4 (0.6)     |                |                      |
| Papaya      |           |               |                |               |                |                      |               |                |               |                |                      |
| Total       | Baseline  | 3.8 (0.8)     |                | 3.5 (0.6)     |                |                      | 4.6 (0.5)     | **             | 4.3 (0.9)     | ***            | ***                  |
|             | Follow-up | 2.8 (0.6)     |                | 4.1 (0.7)     |                |                      | 3.3 (0.5)     |                | 4.9 (0.6)     |                |                      |
| Hedonic     | Baseline  | 0.1 (0.1)     |                | 0.5 (0.2)     |                |                      | 0.6 (0.3)     |                | 0.8 (0.4)     |                |                      |
|             | Follow-up | 0.1 (0.1)     |                | 0.0 (0.0)     |                |                      | 0.2 (0.1)     |                | 0.4 (0.2)     |                |                      |
| Descriptive | Baseline  | 2.6 (0.5)     |                | 2.8 (0.5)     |                | *                    | 2.8 (0.5)     |                | 2.3 (1.0)     | **             | **                   |
|             | Follow-up | 1.7 (0.4)     |                | 3.6 (0.7)     |                |                      | 2.3 (0.4)     |                | 4.1 (0.7)     |                |                      |
| Other       | Baseline  | 1.1 (0.4)     |                | 0.3 (0.2)     |                |                      | 1.3 (0.2)     |                | 1.3 (0.5)     |                |                      |
|             | Follow-up | 1.0 (0.4)     |                | 0.5 (0.3)     |                |                      | 0.8 (0.2)     |                | 0.4 (0.2)     |                |                      |
| Prune       |           |               |                |               |                |                      |               |                |               |                |                      |
| Total       | Baseline  | 2.9 (0.3)     |                | 3.5 (0.6)     |                |                      | 4.4 (0.5)     |                | 4.1 (0.5)     |                |                      |
|             | Follow-up | 3.6 (0.6)     |                | 3.9 (0.4)     |                |                      | 4.3 (0.4)     |                | 4.5 (0.4)     |                |                      |
| Hedonic     | Baseline  | 0.0 (0.0)     |                | 0.1 (0.1)     |                |                      | 0.1 (0.1)     |                | 0.4 (0.3)     |                |                      |
|             | Follow-up | 0.1 (0.1)     |                | 0.0 (0.0)     |                |                      | 0.0 (0.0)     |                | 0.3 (0.2)     |                |                      |
| Descriptive | Baseline  | 2.3 (0.3)     |                | 2.6 (0.6)     |                |                      | 3.2 (0.5)     |                | 2.8 (0.5)     |                |                      |
|             | Follow-up | 2.3 (0.7)     |                | 3.1 (0.4)     |                |                      | 3.4 (0.4)     |                | 3.8 (0.4)     |                |                      |
| Other       | Baseline  | 0.6 (0.3)     |                | 0.8 (0.3)     |                |                      | 1.2 (0.3)     |                | 1.0 (0.4)     |                |                      |
|             | Follow-up | 0.9 (0.3)     |                | 0.8 (0.2)     |                |                      | 0.9 (0.3)     |                | 0.5 (0.3)     |                |                      |
| Caper berry |           |               |                |               |                |                      |               |                |               |                |                      |
| Total       | Baseline  | 3.1 (0.3)     |                | 3.3 (0.4)     |                |                      | 3.7 (0.6)     |                | 3.4 (0.3)     |                |                      |
|             | Follow-up | 2.5 (0.4)     |                | 3.4 (0.5)     |                |                      | 3.7 (0.5)     |                | 4.3 (0.5)     |                |                      |
| Hedonic     | Baseline  | 0.1 (0.1)     |                | 0.4 (0.2)     |                |                      | 0.5 (0.2)     |                | 0.3 (0.2)     |                |                      |
|             | Follow-up | 0.2 (0.1)     |                | 0.1 (0.1)     |                |                      | 0.3 (0.1)     |                | 0.1 (0.1)     |                |                      |
| Descriptive | Baseline  | 2.3 (0.3)     |                | 2.3 (0.5)     |                | *                    | 2.5 (0.4)     |                | 2.8 (0.4)     |                |                      |
|             | Follow-up | 1.7 (0.4)     |                | 3.0 (0.6)     |                |                      | 3.1 (0.5)     |                | 3.8 (0.6)     |                |                      |
| Other       | Baseline  | 0.7 (0.2)     |                | 0.6 (0.4)     |                |                      | 0.7 (0.3)     |                | 0.4 (0.3)     |                |                      |
|             | Follow-up | 0.6 (0.3)     |                | 0.3 (0.3)     |                |                      | 0.3 (0.1)     |                | 0.4 (0.3)     |                |                      |

Significance level estimated by a linear mixed model. Abbreviations: Game-children (GC), non-game-children (nGC), game-parents (GP), non-game-parents (nGP). Significance levels:  $p < 0.001$  \*\*\*,  $p < 0.01$  \*\*,  $p < 0.05$ .  
<sup>a</sup>p-value show significant level of change between baseline and follow-up in the groups.  
<sup>b</sup>p-value show significant level of difference in change between the groups.
